# Supplementary material
Source: PubMed Central journal article supplement (PMC7460900)
Supplement: ASN.2020010024SupplementaryData.pdf [file ASN.2020010024SupplementaryData.pdf]

**Supplemental Table 1. Comparison of participant characteristics in the analytic sample to the ARIC Sleep Heart Health Study (SHHS) Cohort**

|                                                       | Analytic Sample<br>(N=1,525) | ARIC SHHS<br>(N=1,920) |
|-------------------------------------------------------|------------------------------|------------------------|
| <b>Demographics</b>                                   |                              |                        |
| Baseline age, mean years $\pm$ SD                     | 62.5 $\pm$ 5.4               | 62.5 $\pm$ 5.6         |
| Female, n (%)                                         | 799 (52.4)                   | 988 (51.4)             |
| Education Level, n (%)                                |                              |                        |
| < high school                                         | 159 (10.4)                   | 211 (11.0)             |
| high school graduate                                  | 712 (46.7)                   | 675 (35.2)             |
| > high school graduate                                | 654 (42.9)                   | 1031 (53.7)            |
| <b>Lifestyle Behavioral Characteristics</b>           |                              |                        |
| Smoking, n (%)                                        |                              |                        |
| Current                                               | 163 (10.7)                   | 199 (10.4)             |
| Former                                                | 739 (48.5)                   | 871 (45.4)             |
| Never                                                 | 623 (40.8)                   | 846 (44.0)             |
| Current Alcohol consumption, n (%)                    |                              |                        |
| Current                                               | 1042 (68.3)                  | 866 (45.1)             |
| <b>Health Status Characteristics</b>                  |                              |                        |
| BMI, kg/m <sup>2</sup> , mean $\pm$ SD                | 28.6 $\pm$ 5.1               | 28.8 $\pm$ 5.1         |
| Systolic BP, mmHg, mean $\pm$ SD                      | 125.4 $\pm$ 17.7             | 121.6 $\pm$ 17.2       |
| Diastolic BP, mmHg, mean $\pm$ SD                     | 70.7 $\pm$ 9.4               | 71.2 $\pm$ 9.5         |
| Anti-hypertensive medication use, n (%)               | 423 (27.7)                   | 669 (34.8)             |
| <b>Sleep Characteristics</b>                          |                              |                        |
| Arousal index, avg # per night, mean $\pm$ SD         | 19.1 $\pm$ 9.9               | 19.26 $\pm$ 10.3       |
| Sleep efficiency, mean $\pm$ SD                       | 84.0 $\pm$ 9.1               | 83.8 $\pm$ 9.4         |
| Self-reported poor sleep quality, n (%)               | 645 (42.3)                   | 822 (42.8)             |
| Habitual sleep duration, avg hrs/night, mean $\pm$ SD | 7.3 $\pm$ 1.1                | 7.3 $\pm$ 1.1          |

Presented as mean  $\pm$  SD unless otherwise noted

**Supplemental Table 2: Associations of obstructive sleep apnea (OSA) severity and risk of incident Chronic Kidney Disease (CKD, Stage 3) stratified by age: the Atherosclerosis Risk in Communities (ARIC) Study (N=1525)**

| <b>Participants &lt; 62 years (n=713)</b> |               |                   |                   |                   |                |
|-------------------------------------------|---------------|-------------------|-------------------|-------------------|----------------|
| <b>AHI category</b>                       | <b>&lt; 5</b> | <b>5 - 14.9</b>   | <b>15 - 29</b>    | <b>≥ 30</b>       | <b>p-trend</b> |
| Model 1                                   | 1 (reference) | 1.07 (0.74, 1.55) | 1.04 (0.62, 1.75) | 2.34 (1.34, 4.08) | <0.001         |
| Model 2                                   | 1 (reference) | 1.05 (0.72, 1.53) | 0.94 (0.55, 1.59) | 2.25 (1.28, 3.95) | <0.01          |
| Model 3                                   | 1 (reference) | 0.83 (0.56, 1.22) | 0.67 (0.39, 1.17) | 1.32 (0.71, 2.45) | 0.38           |
| Model 4                                   | 1 (reference) | 0.82 (0.55, 1.22) | 0.63 (0.36, 1.11) | 1.11 (0.60, 2.06) | 0.55           |
| <b>Participants ≥ 62 years (n=812)</b>    |               |                   |                   |                   |                |
| <b>AHI category</b>                       | <b>&lt; 5</b> | <b>5 - 14.9</b>   | <b>15 - 29</b>    | <b>≥ 30</b>       | <b>p-trend</b> |
| Model 1                                   | 1 (reference) | 0.89 (0.68, 1.16) | 0.87 (0.61, 1.24) | 1.25 (0.83, 1.89) | 0.39           |
| Model 2                                   | 1 (reference) | 0.96 (0.73, 1.27) | 0.88 (0.62, 1.26) | 1.32 (0.87, 1.99) | 0.34           |
| Model 3                                   | 1 (reference) | 0.93 (0.71, 1.23) | 0.78 (0.55, 1.13) | 1.02 (0.66, 1.59) | 0.70           |
| Model 4                                   | 1 (reference) | 0.87 (0.65, 1.15) | 0.82 (0.57, 1.18) | 1.05 (0.68, 1.62) | 0.99           |

Model 1: Adjusted for age, sex, center, education

Model 2: Adjusted for Model 1 + smoking, alcohol consumption, physical activity

Model 3: Adjusted for Model 2 + BMI

Model 4: Adjusted for Model 3 + hsCRP, prevalent diabetes, systolic blood pressure, diastolic blood pressure, anti-hypertensive medications, and prevalent CHD
